# Supplementary material for: Structural, magnetic and optical properties of disordered double perovskite Gd2CoCrO6 nanoparticles
Source: Royal Society of Chemistry journal article supplement (doi:10.1039/d3ra02233a), 2023-01-01
Supplement: d3ra02233a1.pdf [file d3ra02233a1.pdf]

Electronic supplementary information (ESI)

## Structural, magnetic and optical properties of disordered double perovskite $\text{Gd}_2\text{CoCrO}_6$ nanoparticles

M J Hosen,<sup>a,b</sup> M A Basith<sup>b</sup> and I M Syed<sup>a,c,d</sup>

S1 FTIR spectroscopy

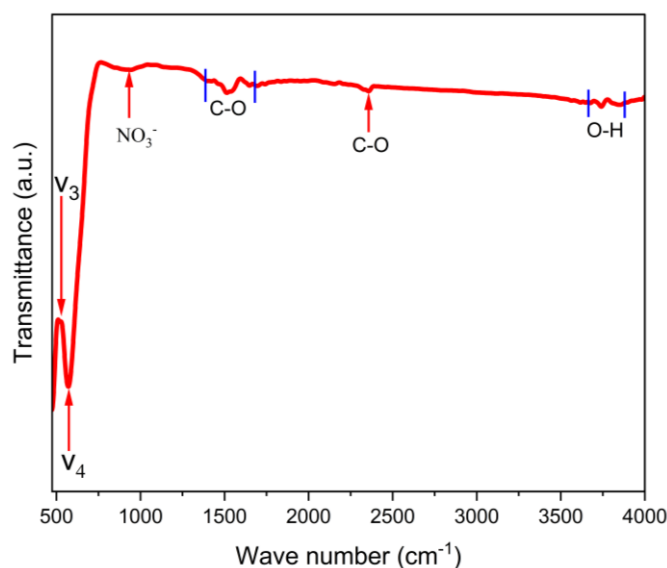

**Figure S1** FTIR Spectrum of as-synthesized GCCO nanoparticles observed at RT.

<sup>a</sup> Department of Physics, University of Dhaka, Dhaka-1000, Bangladesh.

<sup>b</sup> Nanotechnology Research Laboratory, Department of Physics, Bangladesh University of Engineering and Technology, Dhaka-1000, Bangladesh.

<sup>c</sup> Semiconductor Technology Research Center, University of Dhaka, Dhaka-1000, Bangladesh.

<sup>d</sup> Centre for Advanced Research in Sciences, University of Dhaka, Dhaka-1000, Bangladesh.

† Electronic Supplementary Information (ESI) available: [details of any supplementary information available should be included here]. See DOI: 10.1039/x0xx00000x

# Electronic supplementary information (ESI)

## S2 TGA and DTA analysis

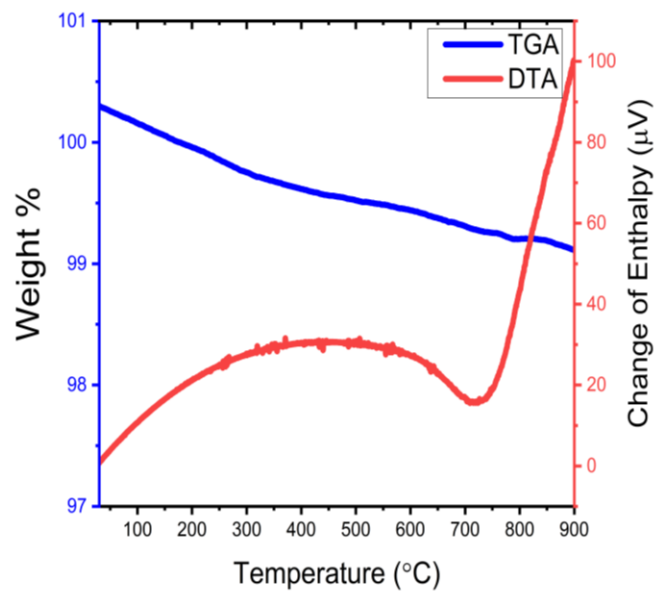

**Figure S2** TGA and DTA curves of GCCO double perovskite.
